# Supplementary material
Source: PubMed Central journal article supplement (PMC8671202)
Supplement: NIHMS1743831-supplement-1.pdf [file NIHMS1743831-supplement-1.pdf]

## 1 **E-Supplement**

### 2 **Medicaid Data**

3 The data were centrally compiled and cleaned by the Research Data Assistance Center  
4 (ResDAC, University of Minnesota, Minneapolis, MN) and obtained by the authors in August  
5 2018. Three states were excluded from the analysis because of concerns about data quality:  
6 Maine, which had incomplete utilization data, and Idaho and Rhode Island, which had  
7 abnormally low levels of enrollment (<1000 individuals). In addition, five states were excluded  
8 because greater than 15% of subjects had missing data for race/ethnicity: Colorado, Iowa,  
9 Massachusetts, Vermont, and Washington. Use of the data was approved by the Johns Hopkins  
10 School of Medicine Institutional Review Board.

11

### 12 **Definition of Covariates**

13 Race/ethnicity was defined by self-report, and categories included “White,” “Black,” “Asian,”  
14 “Hispanic,” “North American Native,” “>1 race (Hispanic), >1 race (non-Hispanic), Hawaiian,  
15 and “Unknown.” For the purpose of analysis, “Native American/Alaskan,” “>1 race (Hispanic),  
16 “>1 race (non-Hispanic),” and “Hawaiian” were combined into “Grouped.” Urbanization was  
17 categorized according to this scheme as “large central metro,” “large fringe metro (suburban)”  
18 “medium metro” (250,000-999,999 population), “small metro” (50,000 – 249,999 population),  
19 “micropolitan” (10,000 – 49,999 population, and “noncore” (rural, <10,000 population).  
20 Neighborhood-level poverty was defined as the proportion of families at or below the poverty  
21 level in the ZCTA. Distance to provider was categorized as “<10 miles,” “10-25 miles,” “26-50  
22 miles,” “51-100 miles,” “101-200 miles,” and “>201 miles).

23

24 **Statistical Analysis**

25 Age, race, gender, ZCTA-level poverty, county urban-rural code, and distance to provider were  
26 all treated as categorical variables in the multivariable logistic regression models. We first  
27 assessed the association between distance to provider, urban/rural status, and poverty using  
28 empirical cumulative distribution functions as a descriptive summary. Sensitivity analyses were  
29 conducted defining distance to provider as a continuous variable on linear and log-transformed  
30 scales.

31

32 **Figure Legend:**

33

34

35

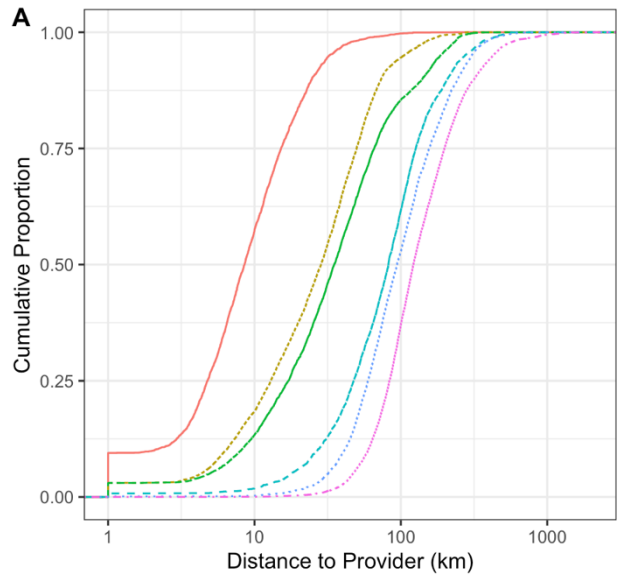

Urban-Rural Category

- Large Central Metro    - - - Medium Metro    ···· Micropolitan
- Large Fringe Metro    - - - Small Metro    ···· Non-core (Rural)

**Urban/Rural Status**

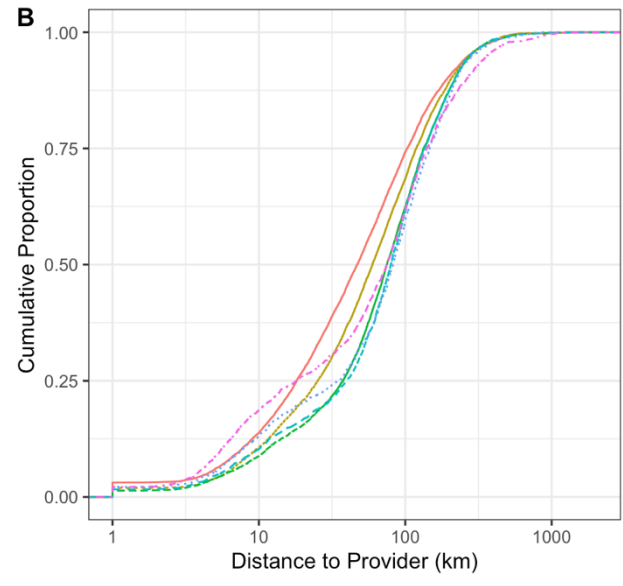

Neighborhood Poverty

- 0 - 5%    - - - 11 - 15%    ···· 21 - 25%
- 6 - 10%    - - - 16 - 20%    ···· 26 - 100%

**Neighborhood-Level Poverty**
